# Supplementary material for: Characterization of a Tigecycline-, Linezolid- and Vancomycin-Resistant Clinical Enteroccoccus faecium Isolate, Carrying vanA and vanB Genes
Source: PubMed Central journal article supplement — Infect Dis Ther. 2023 Oct 11;12(11):2545–65. doi: 10.1007/s40121-023-00881-3 (PMC10651664; doi:10.1007/s40121-023-00881-3), 2023-10-11
Supplement: 40121_2023_881_MOESM1_ESM.pdf [file 40121_2023_881_MOESM1_ESM.pdf]

**Characterization of a tigecycline-, linezolid- and vancomycin-resistant clinical *Enterococcus faecium* isolate, carrying *vanA* and *vanB* genes**

Ewa Wardal<sup>1</sup>, Dorota Żabicka<sup>2</sup>, Tomasz Skalski<sup>3</sup>, Joanna Kubiak-Pulkowska<sup>3</sup>, Waleria Hryniewicz<sup>2</sup>, Ewa Sadowy<sup>1#</sup>

<sup>1</sup>Department of Molecular Microbiology, National Medicines Institute, ul. Chełmska 30/34, 00-725 Warsaw, Poland

<sup>2</sup>Department of Epidemiology and Clinical Microbiology, National Medicines Institute, ul. Chełmska 30/34, 00-725 Warsaw, Poland

<sup>3</sup>Department of Clinical Microbiology and Molecular Diagnostics, University Hospital no 2, ul. Ujejskiego 75, Bydgoszcz

# Address for correspondence:

Prof. Ewa Sadowy

Department of Molecular Microbiology

National Medicines Institute

Ul. Chelmska 30/34

00-725 Warsaw

Poland

Tel.: +48 22 851 4388

Fax: +48 22 841 2949

E-mail address: [e.sadowy@nil.gov.pl](mailto:e.sadowy@nil.gov.pl)

[orcid.org/0000-0003-0284-6440](https://orcid.org/0000-0003-0284-6440)

Supplementary Table 1. Genomic relationships of the 4995/20 isolate with other *E. faecium* isolates reported to the GenBank database (accessed on the 9<sup>th</sup> August 2023). Data on 4995/20 isolate included for comparative purposes.

| Isolate     | ST | SNP cluster    | Country of isolation | Source           | <i>vanA</i> | <i>vanB</i> | <i>tet(M)</i> | <i>tet(L)</i> | <i>dfrG</i> | <i>poxtA</i> | <i>fexB</i> | Assembly/ Short Reads Archive |
|-------------|----|----------------|----------------------|------------------|-------------|-------------|---------------|---------------|-------------|--------------|-------------|-------------------------------|
| 4995/20     | 18 | PDS000100071.5 | Poland               | human (hematoma) | +           | +           | +             | +             | -           | +            | +           | GCA_020221735.2               |
|             |    |                |                      |                  |             |             |               |               |             |              |             |                               |
| SJ267       | 18 | PDS000100071.5 | Ireland              | human            | +           | -           | +             | -             | +           | -            | -           | GCA_021338535.1               |
| RC-19-040   | 18 | PDS000100071.5 | Ireland              | human            | +           | -           | +             | -             | +           | -            | -           | GCA_021330095.1               |
| SJ178       | 18 | PDS000100071.5 | Ireland              | human            | +           | -           | +             | -             | +           | -            | -           | GCA_021327155.1               |
| JH019       | 18 | PDS000100071.5 | Ireland              | human            | +           | -           | +             | -             | +           | -            | -           | GCA_021331535.1               |
| JH017       | 18 | PDS000100071.5 | Ireland              | human            | +           | -           | +             | -             | +           | -            | -           | GCA_021326645.1               |
| BSI-SJ82    | 18 | PDS000100071.5 | Ireland              | human            | +           | -           | +             | -             | +           | -            | -           | GCA_021333455.1               |
| P01-D01-M4  | 18 | PDS000100071.5 | Uganda               | human (blood)    | -           | -           | +             | +             | +           | -            | -           | SRS18227107                   |
| P01-B02-M10 | 18 | PDS000100071.5 | Uganda               | human (blood)    | -           | -           | +             | +             | +           | -            | -           | SRS18227101                   |
| P01-F01-M6  | 18 | PDS000100071.5 | Uganda               | human (blood)    | -           | -           | +             | +             | +           | -            | -           | SRS18227096                   |
| EFM0003     | 18 | PDS000100071.5 | n/a                  | n/a              | +           | -           | +             | -             | +           | -            | -           | ERS4370981                    |
| EFM0461     | 18 | PDS000100071.5 | n/a                  | n/a              | +           | -           | +             | -             | +           | -            | -           | ERS5061401                    |
| EFM0469     | 18 | PDS000100071.5 | n/a                  | n/a              | +           | -           | +             | -             | +           | -            | -           | ERS5061407                    |

n/a, data not available.

Supplementary Table 2. Occurrence of the *fexB-poxA*-PCT among bacterial isolates reported to GenBank (the nt-prok database, accessed the 9<sup>th</sup> of May 2023). Data on 4995/20 isolate included for comparative purposes.

| Species            | Isolate   | Localization | Plasmid size (kb) | del 904 nt <sup>a</sup> in PCT | Other variants in PCT <sup>a</sup> | Country     | Host               | Accession number |
|--------------------|-----------|--------------|-------------------|--------------------------------|------------------------------------|-------------|--------------------|------------------|
| <i>E. faecium</i>  | 4995/20   | p4995_2      | 42.4              | +                              | none                               | Poland      | human (hematoma)   | CP084180.1       |
| <i>E. faecium</i>  | 18-465    | p18-465_1    | 24.4              | +                              | ins 95 nt                          | France      | human (faeces)     | CP065753.1       |
|                    | M1        | pEfM1        | 30.9              | +                              | ins 95 nt                          | Italy       | river              | ON009374.1       |
|                    | R186-2    | pR186-2-B    | 46.5              | +                              | ins 95 nt                          | Switzerland | cattle             | CP116522.1       |
|                    | 1818      | p1818_c      | 23.9              | +                              | ins 95 nt                          | Switzerland | human (faeces)     | CP091209.1       |
|                    | 211b      | p211b-b      | 28.2              | +                              | ins 95 nt                          | Switzerland | human (faeces)     | CP091212.1       |
|                    | AT02      | pAT02-b      | 52.5              | +                              | ins 95 nt                          | Switzerland | pet food           | CP097063.1       |
|                    | F179      | pF197_3      | 26.7              | +                              | del 14 bp; ins 95 nt               | Switzerland | water              | CP072887.1       |
|                    | K69-1a    | pK69-1a-C    | 28.6              | -                              | ins 95 nt                          | Switzerland | cattle             | CP116526.1       |
|                    | K191-3    | pK191-3-B    | 24.8              | -                              | ins 95 nt                          | Switzerland | cattle             | CP116534.1       |
|                    | K195-6b   | pK195-6b-B   | 44.0              | -                              | ins 95 nt                          | Switzerland | cattle             | CP116516.1       |
|                    | 1525      | p1525-b      | 21.4              | -                              | ins 75 nt                          | Switzerland | human (faeces)     | CP091219.1       |
|                    | AT45b     | pAT45b-b     | 24.8              | -                              | ins 95 nt                          | Switzerland | pet food           | CP097024.1       |
|                    | K188-5    | pK188-5-B    | 24.6              | -                              | del 107 nt                         | Switzerland | cattle             | CP116530.1       |
|                    | 116       | p116-1       | 21.6              | +                              | ins 95 nt                          | China       | animal             | CP047328.1       |
| <i>E. faecalis</i> | LS05-2    | chromosome   | n/a               | +                              | ins 95 nt                          | Switzerland | pet food           | CP097004.1       |
|                    | 1521      | chromosome   | n/a               | +                              | ins 95 nt                          | Switzerland | human (faeces)     | CP091237.1       |
| <i>E. hirae</i>    | GE2       | pEh-GE2      | 24.8              | +                              | ins 95 nt                          | Italy       | marine zooplankton | MT683616.1       |
|                    | 697       | p697-a       | 53.0              | -                              | ins 72 nt                          | Switzerland | human (faeces)     | CP091202.1       |
| <i>S. aureus</i>   | AOUC-0915 | chromosome   | n/a               | +                              | del 104 nt; ins 95 nt              | Italy       | human              | MH746818.1       |

<sup>a</sup>see Supplementary Fig. 4 for details; n/a, not applicable; n/k, not known.

Supplementary Table 3. Occurrence of the *tet(M)*-*tet(L)*-PCT among bacterial isolates reported to GenBank (the nt-prok database, accessed the 11<sup>th</sup> of May 2023). Data on 4995/20 isolate included for comparative purposes.

| Species              | Isolate   | Plasmid name | Plasmid size (kb) | PCT variants <sup>a</sup> | Country     | Source           | Accession number |
|----------------------|-----------|--------------|-------------------|---------------------------|-------------|------------------|------------------|
| <i>E. faecium</i>    | 4995/20   | p4995_2      | 42.4              | none                      | Poland      | human (hematoma) | CP084180.1       |
| <i>E. faecium</i> *  | EF3       | pEfm-EF3     | 27.7              | none                      | Italy       | marine sediment  | MT683615.1       |
|                      | M1        | pEfm-M1      | 30.9              | ins 27 nt                 | Italy       | river            | ON009374.1       |
|                      | AT45b     | pAT45b-d     | 18.5              | ins 27 nt                 | Switzerland | pet food         | CP097026.1       |
|                      | S2-6b     | pS2-6b-b     | 30.8              | ins 27 nt                 | Switzerland | pig              | CP088193.1       |
|                      | 264a      | p264a-c      | 27.4              | ins 27 nt                 | Switzerland | human (faeces)   | CP091216.1       |
|                      | 642       | p642-b       | 21.8              | ins 27 nt                 | Switzerland | human (faeces)   | CP091223.1       |
|                      | K70-1a    | pK70-1a-B    | 39.5              | ins 27 nt                 | Switzerland | cattle           | CP116545.1       |
|                      | 27        | pC27-2       | 62.4              | ins 27 nt                 | China       | pig              | MH784602.1       |
|                      | 25        | pC25-1       | 67.8              | ins 27 nt                 | China       | pig              | MH784601.1       |
|                      | SDGJP3    | pSDGJP3      | 51.7              | ins 27 nt                 | China       | pig              | CP038171.1       |
| <i>E. faecalis</i>   |           |              |                   |                           |             |                  |                  |
|                      | T90-1     | pT90-1       | 54.3              | ins 27 nt                 | China       | pig              | CP068250.1       |
|                      | T90-3     | pT90-3       | 71.1              | ins 27 nt                 | China       | pig              | CP069131.1       |
|                      | T90-4     | pT90-4       | 35.6              | ins 27 nt                 | China       | pig              | CP069155.1       |
|                      | T90-6     | pT90-6       | 149.5             | ins 27 nt                 | China       | pig              | CP069129.1       |
| <i>E. hirae</i>      | TF52      | pTF52-21k    | 21.8              | del 9 nt                  | China       | pig              | CP109810.1       |
|                      | TF34      | pTF34-21k    | 21.8              | ins 27 nt                 | China       | pig              | CP109806.1       |
|                      | DY27      | pDY27-poxTA  | 53.5              | ins 27 nt                 | France      | pig              | MW207669.1       |
|                      | DY13      | pDY13-poxTA  | 25.2              | ins 27 nt                 | China       | pig              | MW207667.1       |
|                      | fas4      | pfas4-1      | 57.3              | ins 27 nt                 | China       | pig              | MK798157.1       |
|                      | S46-3     | pS46-3-a     | 35.2              | ins 27 nt                 | Switzerland | pig              | CP088188.1       |
|                      | DSM 20160 | p3ZJ02       | 26.0              | none                      | China       | pig              | CP122307.1       |
| <i>E. durans</i>     | S8-3      | pS8-3-a      | 21.8              | ins 27 nt                 | Switzerland | pig              | CP088204.1       |
|                      | R109-1    | pR109-1-A    | 27.9              | ins 27 nt                 | Switzerland | cattle           | CP116580.1       |
| <i>E. gallinarum</i> | FS4       | pEgFS4-2     | 38.4              | ins 27 nt                 | Italy       | pig              | MZ291453.1       |

<sup>a</sup>see Supplementary Fig. 5 for details; \*for *E. faecium* 10 top hits are shown.

Supplementary Table 4. Occurrence of the p4995\_4-like plasmids among bacterial isolates reported to GenBank (the nt-prok database, accessed the 15<sup>th</sup> of August 2023). Data on 4995/20 isolate included for comparative purposes.

| Species             | Isolate   | Plasmid name     | Plasmid size (kb) | Country   | Source           | Accession number |
|---------------------|-----------|------------------|-------------------|-----------|------------------|------------------|
| <i>E. faecium</i>   | 4995/20   | p4995_4          | 11.6              | Poland    | human (hematoma) | CP084184.1       |
|                     |           |                  |                   |           |                  |                  |
| <i>E. faecium</i> * | V1836     | pHVH-V1836-4     | 11.6              | Denmark   | human (rectum)   | CP044268.1       |
|                     | 15-307-1  | p15-307-1_06     | 11.8              | France    | human (rectum)   | CP044322.1       |
|                     | UK040     | pUK040_3         | 21.2 <sup>a</sup> | Germany   | human            | CP091580.1       |
|                     | VB3378    | pVB3378_p7       | 11.6              | India     | human (blood)    | CP072714.1       |
|                     | VB3338    | pVB3338_P7       | 11.6              | India     | human (blood)    | CP062272.1       |
|                     | BP3378    | pBP3378_P7       | 11.6              | India     | human (blood)    | CP059800.1       |
|                     | BP657     | pBP657_P4        | 11.8              | India     | human (blood)    | CP059820.1       |
|                     | A7214     | pA7214_P4        | 11.8              | India     | human (blood)    | CP059751.1       |
|                     | A4694     | pA4694_P5        | 11.8              | India     | human (blood)    | CP059744.1       |
|                     | ME3       | plasmid_unnamed2 | 51.6 <sup>b</sup> | India     | river water      | CP043867.1       |
|                     | AA290     | pAA290_4 DNA     | 11.8              | Japan     | human            | AP026637.1       |
|                     | A11051    | pA11051_P4       | 9.9               | India     | human (blood)    | CP059768.1       |
|                     | VB6521    | pVB6521_p4       | 9.9               | India     | human (blood)    | CP072724.1       |
|                     | VB6171    | pVB6171_p4       | 9.9               | India     | human (blood)    | CP072735.1       |
|                     | VB13828   | p4VB13828        | 9.9               | India     | human (blood)    | CP071962.1       |
|                     | A6521     | pA6521_4         | 9.9               | India     | human (blood)    | CP061821.1       |
|                     | VRE3382   | plasmid_unnamed2 | 19.9 <sup>a</sup> | Australia | human (rectum)   | CP065530.1       |
|                     | E7160     | plasmid: 6       | 9.9               | Slovenia  | human (faeces)   | LR536667.1       |
|                     | BMT-1-3-1 | pIN-3-1_03       | 11.4              | Germany   | human (rectum)   | CP063596.1       |

\*no hits to other species were found; <sup>a</sup>plasmid dimer; <sup>b</sup>p4995\_4-like plasmid included in a larger plasmid.

Supplementary Table 5. Occurrence of the *rep*<sub>p4995\_5</sub> gene among bacterial isolates reported to GenBank (the nt-prok database, accessed the 15<sup>th</sup> of May 2023). Data on 4995/20 isolate included for comparative purposes.

| Species             | Isolate     | Plasmid name | Plasmid size (kb) | Country         | Source           | Accession number |
|---------------------|-------------|--------------|-------------------|-----------------|------------------|------------------|
| <i>E. faecium</i>   | 4995/20     | p4995_5      | 4.5               | Poland          | human (hematoma) | CP084185.1       |
| <i>E. faecium</i> * | VRE3363     | plasmid 6    | 4.5               | Australia       | human            | CP064349.1       |
|                     | SC1762-D    | p9           | 4.5               | China           | human            | CP085915.1       |
|                     | SC1762      | p9           | 4.5               | China           | human            | CP085903.1       |
|                     | V1836       | pHVH-V1836-7 | 4.5               | Denmark         | human (rectum)   | CP044271.1       |
|                     | V24         | pV24-9       | 4.5               | Denmark         | human (rectum)   | CP036160.1       |
|                     | V2937       | pHVH-V2937-5 | 4.5               | Denmark         | human (rectum)   | CP044279.1       |
|                     | 18-276      | p18-276_4    | 4.5               | France          | human (rectum)   | CP065758.1       |
|                     | 18-204      | p18-204_6    | 4.5               | France          | human (rectum)   | CP066211.1       |
|                     | VREfm1      | pPEC012      | 4.5               | Hungary         | human (wound)    | KY595964.1       |
|                     | A11051      | pA11051_P6   | 4.5               | India           | human (blood)    | CP059770.1       |
|                     | A15023      | pA15023_P5   | 4.5               | India           | human (blood)    | CP059828.1       |
|                     | A6521       | pA6521_5     | 4.5               | India           | human (blood)    | CP061822.1       |
|                     | BA17124     | pBA17124_P6  | 4.5               | India           | human (blood)    | CP059790.1       |
|                     | BP5067      | pBP5067_P5   | 4.5               | India           | human (blood)    | CP059811.1       |
|                     | VB13828     | p7VB13828    | 4.5               | India           | human (blood)    | CP071965.1       |
|                     | VB6171      | pVB6171_p5   | 4.5               | India           | human (blood)    | CP072736.1       |
|                     | VB6521      | pVB6521_p5   | 4.5               | India           | human (blood)    | CP072725.1       |
|                     | VB976       | pVB976_p5    | 4.5               | India           | human (blood)    | CP072591.1       |
|                     | E8172       | plasmid: 8   | 4.5               | The Netherlands | human            | LR135379.1       |
|                     | E7948       | plasmid: 6   | 4.5               | The Netherlands | human            | LR135362.1       |
|                     | Dallas 51_4 | p51_4_4kb    | 4.5               | US              | human (rectum)   | CP066408.1       |
|                     | Dallas 16_1 | p16_1_4kb    | 4.5               | US              | human (rectum)   | CP066388.1       |
|                     | BMT-1-3-1   | pIN-3-1_04   | 5.1               | Germany         | human            | CP063597.1       |
|                     | E7114       | plasmid: 8   | 6.4               | Latvia          | human            | LR135450.1       |
|                     | UK040       | pUK040_4     | 8.5               | Germany         | human            | CP091581.1       |
|                     | EF0656      | pEF0656-4    | 9.4               | China           | human (urine)    | CP114621.1       |
|                     | E7025       | plasmid: 6   | 9.6               | Latvia          | human            | LR135231.1       |
|                     | 15-307-1    | p15-307-1_05 | 24.5              | France          | human (rectum)   | CP044321.1       |
|                     | ME3         | unnamed2     | 51.5              | India           | river water      | CP043867.1       |
|                     | CEP232      | pCEP232      | n/k               | France          | human (rectum)   | MT901633.1       |

\*no hits to other species were found; n/k, not known (partial sequence available).

Supplementary Table 6. Occurrence of the *rep*<sub>p4995\_5</sub> gene among bacterial isolates reported to GenBank (the nt-prok database, accessed the 15<sup>th</sup> of May 2023). Data on 4995/20 isolate included for comparative purposes.

| Species            | Isolate     | Plasmid name | Plasmid size (kb) | Country         | Source           | Accession number |
|--------------------|-------------|--------------|-------------------|-----------------|------------------|------------------|
| <i>E. faecium</i>  | 4995/20     | p4995_5      | 2.1               | Poland          | human (hematoma) | CP084186.1       |
|                    |             |              |                   |                 |                  |                  |
| <i>E. faecium</i>  | HJP554      | pHJP554-4    | 2.1               | China           | human            | CP083477.1       |
|                    | NY11066     | pNY11066-5   | 2.1               | China           | human            | CP093952.1       |
|                    | NY11067     | pNY11067-3   | 2.1               | China           | human (urine)    | CP093956.1       |
|                    | SC1762      | p10          | 2.1               | China           | human            | CP085904.1       |
|                    | SC1762-D    | p10          | 2.1               | China           | human            | CP085916.1       |
|                    | VRE1        | pVRE1-4      | 2.1               | China           | human (urine)    | CP040744.1       |
|                    | V2937       | pHVH-V2937-8 | 2.1               | Denmark         | human (rectum)   | CP044282.1       |
|                    | 15-307-1    | p15-307-1_11 | 2.1               | France          | human (rectum)   | CP044327.1       |
|                    | A10290      | pA10290_P7   | 2.1               | India           | human (blood)    | CP059762.1       |
|                    | A4694       | pA4694_P7    | 2.1               | India           | human (blood)    | CP059746.1       |
|                    | BA17124     | pBA17124_P8  | 2.1               | India           | human (blood)    | CP059792.1       |
|                    | BP3378      | pBP3378_p10  | 2.1               | India           | human (blood)    | CP059803.1       |
|                    | BP5067      | pBP5067_P9   | 2.1               | India           | human (blood)    | CP059815.1       |
|                    | BP657       | pBP657_P6    | 2.1               | India           | human (blood)    | CP059822.1       |
|                    | VB12993     | pVB12993_p6  | 2.1               | India           | human (blood)    | CP072585.1       |
|                    | VB13828     | p10VB13828   | 2.1               | India           | human (blood)    | CP071968.1       |
|                    | VB3338      | pVB3338_p10  | 2.1               | India           | human (blood)    | CP062275.1       |
|                    | VB3378      | pVB3378_p10  | 2.1               | India           | human (blood)    | CP072717.1       |
|                    | VB976       | pVB976_p7    | 2.1               | India           | human (blood)    | CP072593.1       |
|                    | AA290       | pAA290_7     | 2.1               | Japan           | human            | AP026640.1       |
|                    | AA94        | pAA94_3      | 2.1               | Japan           | human            | AP026616.1       |
|                    | E8691       | plasmid: 8   | 2.1               | The Netherlands | dog              | LR135442.1       |
|                    | E4402       | plasmid: 5   | 2.1               | Denmark         | dog              | LR135178.1       |
|                    | E7025       | plasmid: 9   | 2.1               | Latvia          | human            | LR135234.1       |
|                    | E7933       | plasmid: 10  | 2.1               | The Netherlands | human            | LR135393.1       |
|                    | E8440       | plasmid: 9   | 2.1               | The Netherlands | human            | LR135427.1       |
|                    | Dallas 51_4 | p51_4_2kb    | 2.1               | US              | human (rectum)   | CP066398.1       |
|                    | HOU503      | unnamed1     | 2.1               | US              | human            | CP040707.1       |
|                    | E7429       | plasmid: 6   | 8.1               | The Netherlands | human            | LR135302.1       |
|                    | Ef_aus00233 | plasmid: 5   | 22.1              | Australia       | human            | LT598667.1       |
|                    | VRE3355     | unnamed2     | 24.2              | Australia       | human (rectum)   | CP071929.1       |
|                    | E6055       | plasmid: 4   | 41.1              | Portugal        | human (faeces)   | LR135200.1       |
|                    | AA708       | pELF1        | 138.9             | Japan           | human (faeces)   | LC495616.1       |
|                    | ef332       | plas4        | 203.6             | China           | human            | CP058895.1       |
|                    |             |              |                   |                 |                  |                  |
| <i>E. faecalis</i> | 1207/14     | p1207_6      | 2.1               | Poland          | human (faeces)   | CP075610.1       |

n/k, not known.
