# Supplementary material for: Characterization of a Tigecycline-, Linezolid- and Vancomycin-Resistant Clinical Enteroccoccus faecium Isolate, Carrying vanA and vanB Genes
Source: PubMed Central journal article supplement — Infect Dis Ther. 2023 Oct 11;12(11):2545–65. doi: 10.1007/s40121-023-00881-3 (PMC10651664; doi:10.1007/s40121-023-00881-3), 2023-10-11

## Characterization of a tigecycline-, linezolid- and vancomycin-resistant clinical *Enterococcus faecium* isolate, carrying *vanA* and *vanB* genes

Ewa Wardal<sup>1</sup>, Dorota Żabicka<sup>2</sup>, Tomasz Skalski<sup>3</sup>, Joanna Kubiak-Pulkowska<sup>3</sup>, Waleria Hryniewicz<sup>2</sup>, Ewa Sadowy<sup>1#</sup>

<sup>1</sup>Department of Molecular Microbiology, National Medicines Institute, ul. Chełmska 30/34, 00-725 Warsaw, Poland

<sup>2</sup>Department of Epidemiology and Clinical Microbiology, National Medicines Institute, ul. Chełmska 30/34, 00-725 Warsaw, Poland

<sup>3</sup>Department of Clinical Microbiology and Molecular Diagnostics, University Hospital no 2, ul. Ujejskiego 75, Bydgoszcz

# Address for correspondence:

Prof. Ewa Sadowy

Department of Molecular Microbiology

National Medicines Institute

Ul. Chelmska 30/34

00-725 Warsaw

Poland

Tel.: +48 22 851 4388

Fax: +48 22 841 2949

E-mail address: [e.sadowy@nil.gov.pl](mailto:e.sadowy@nil.gov.pl)

[orcid.org/0000-0003-0284-6440](https://orcid.org/0000-0003-0284-6440)

Supplementary Fig. 1

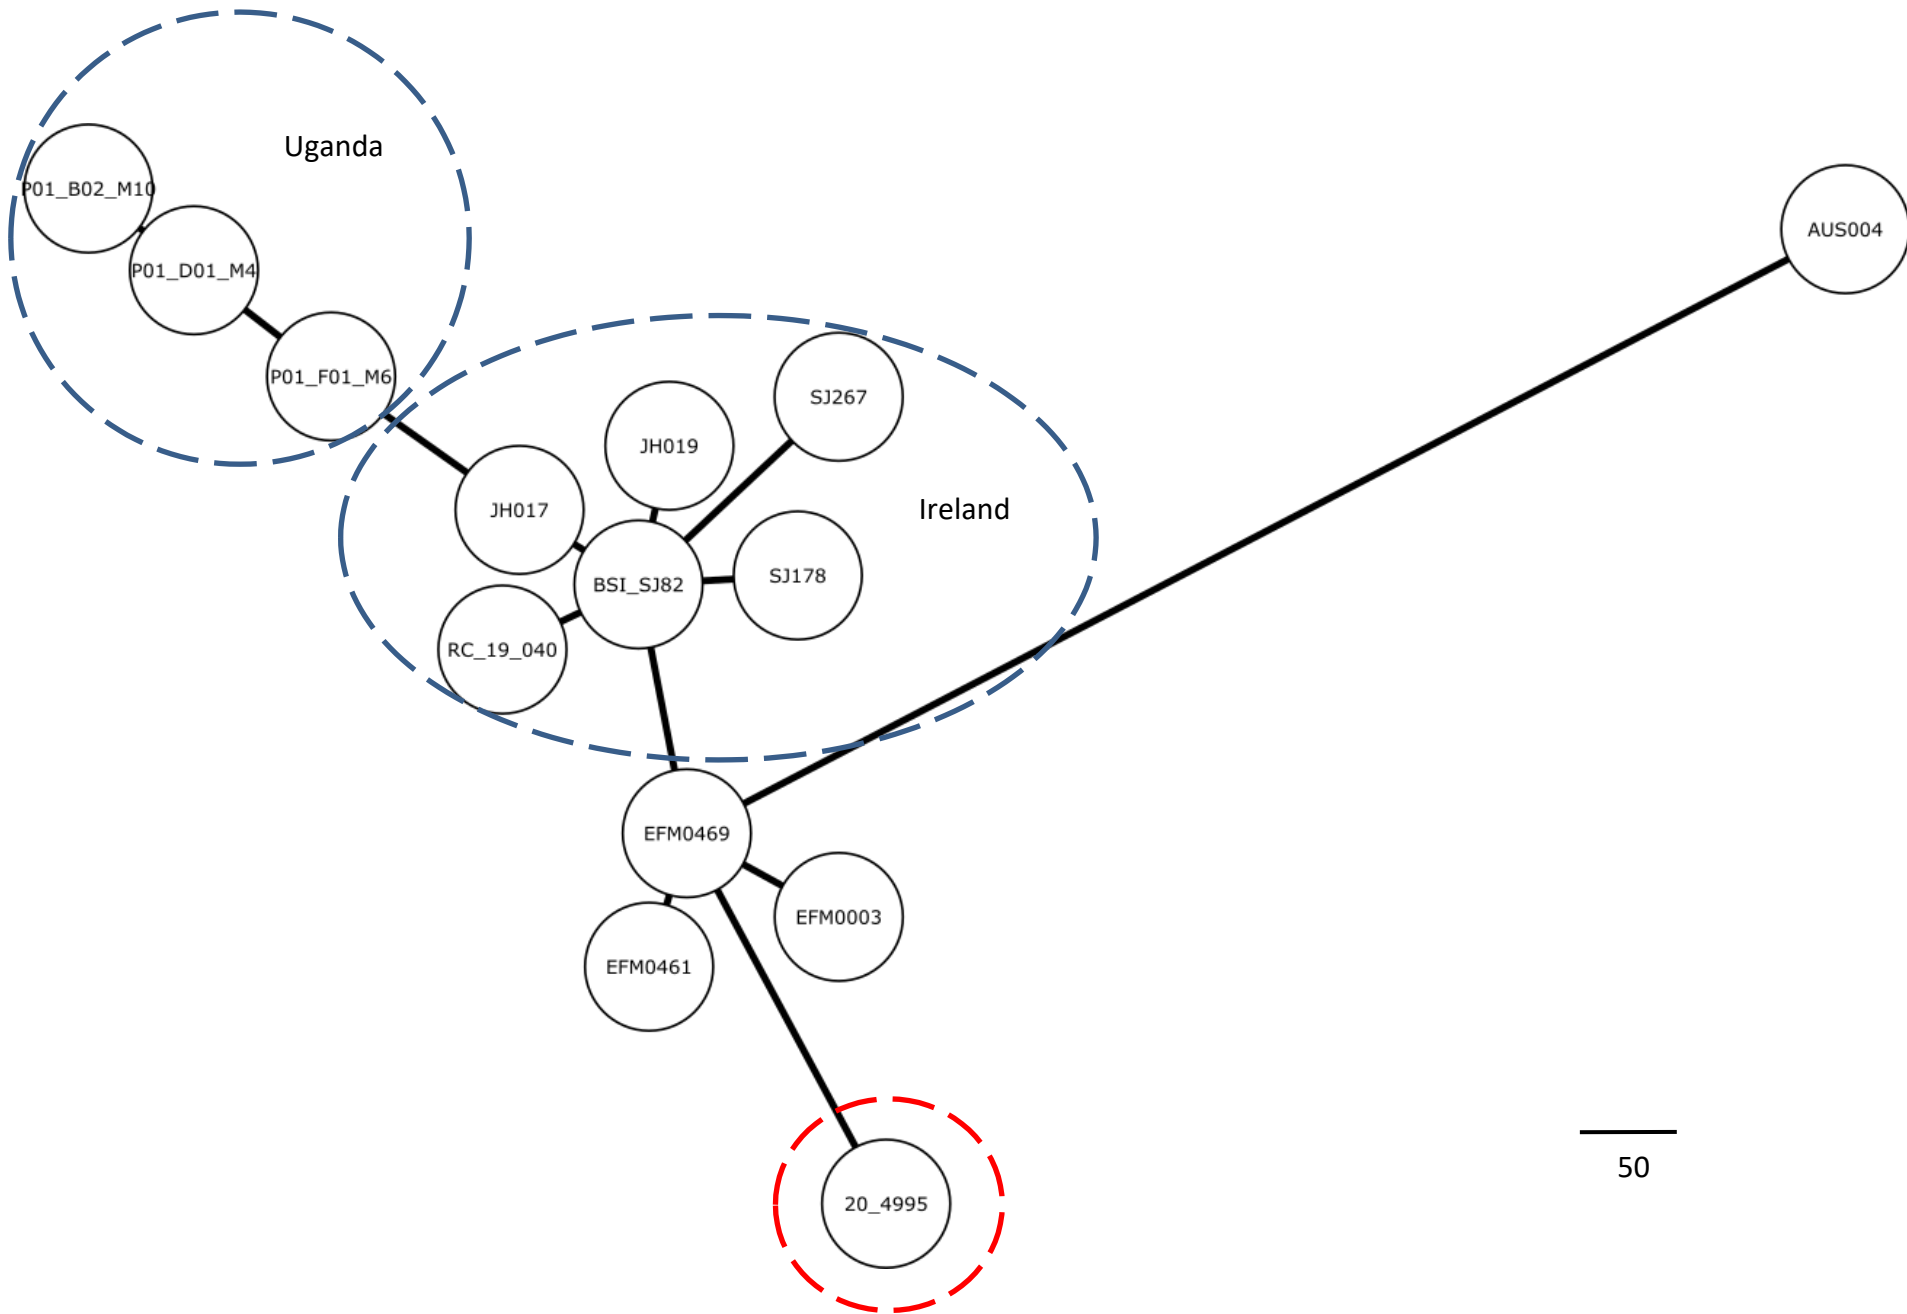

Supplementary Fig. 2

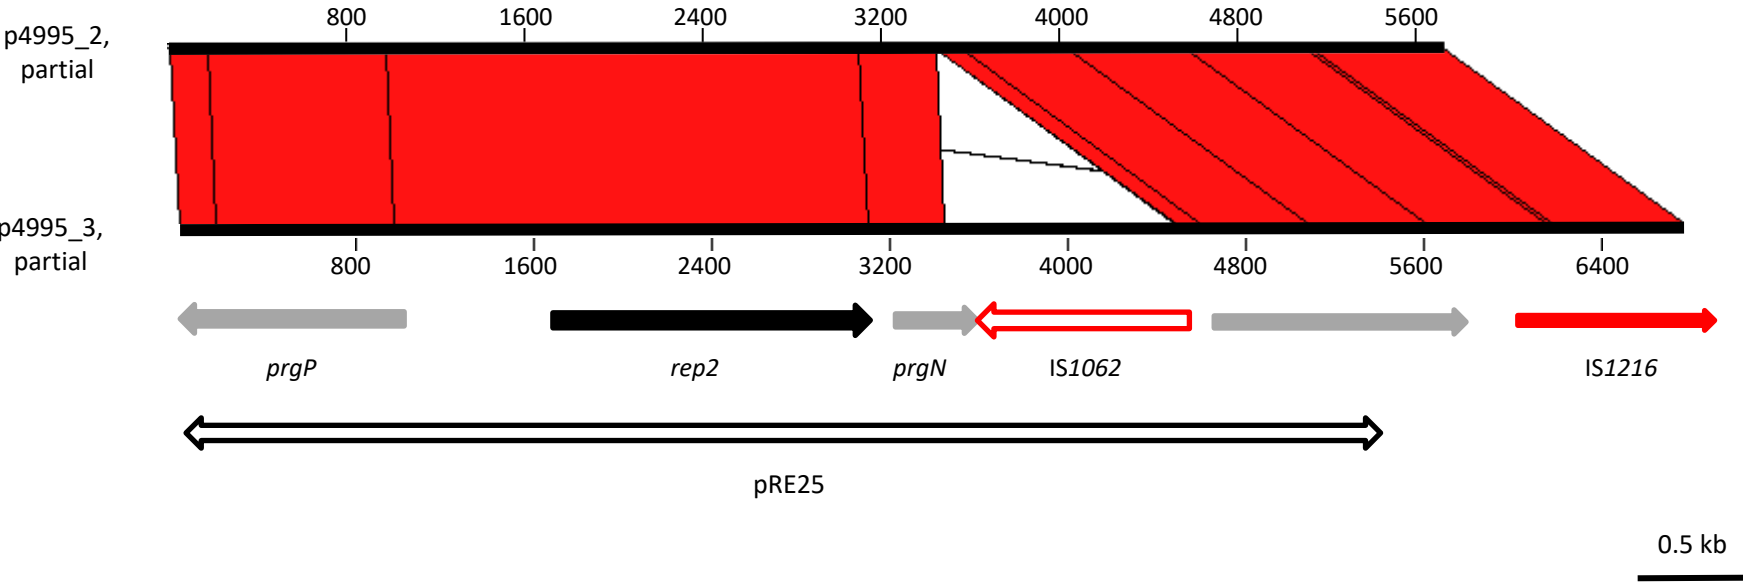

Supplementary Fig. 3.

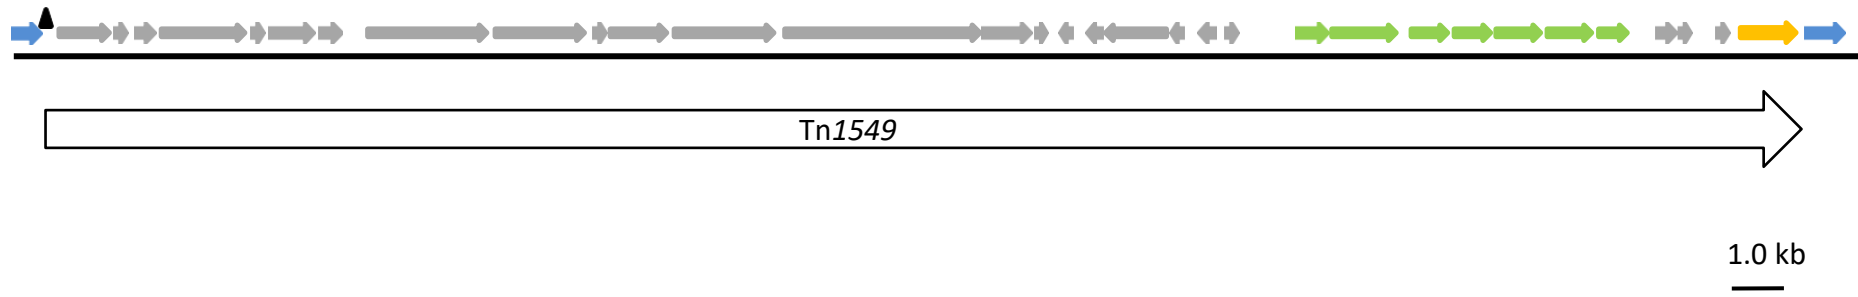

Supplementary Fig. 4

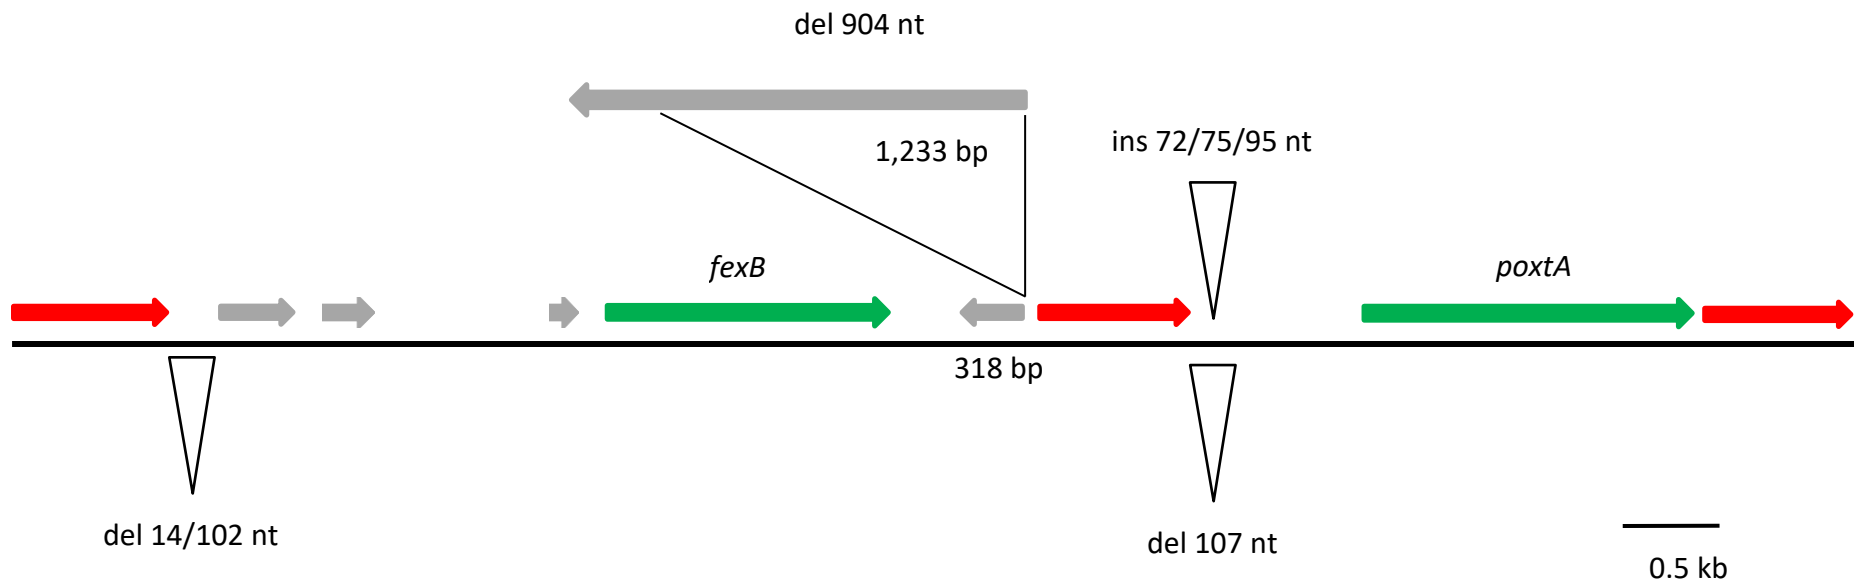

Supplementary Fig. 5

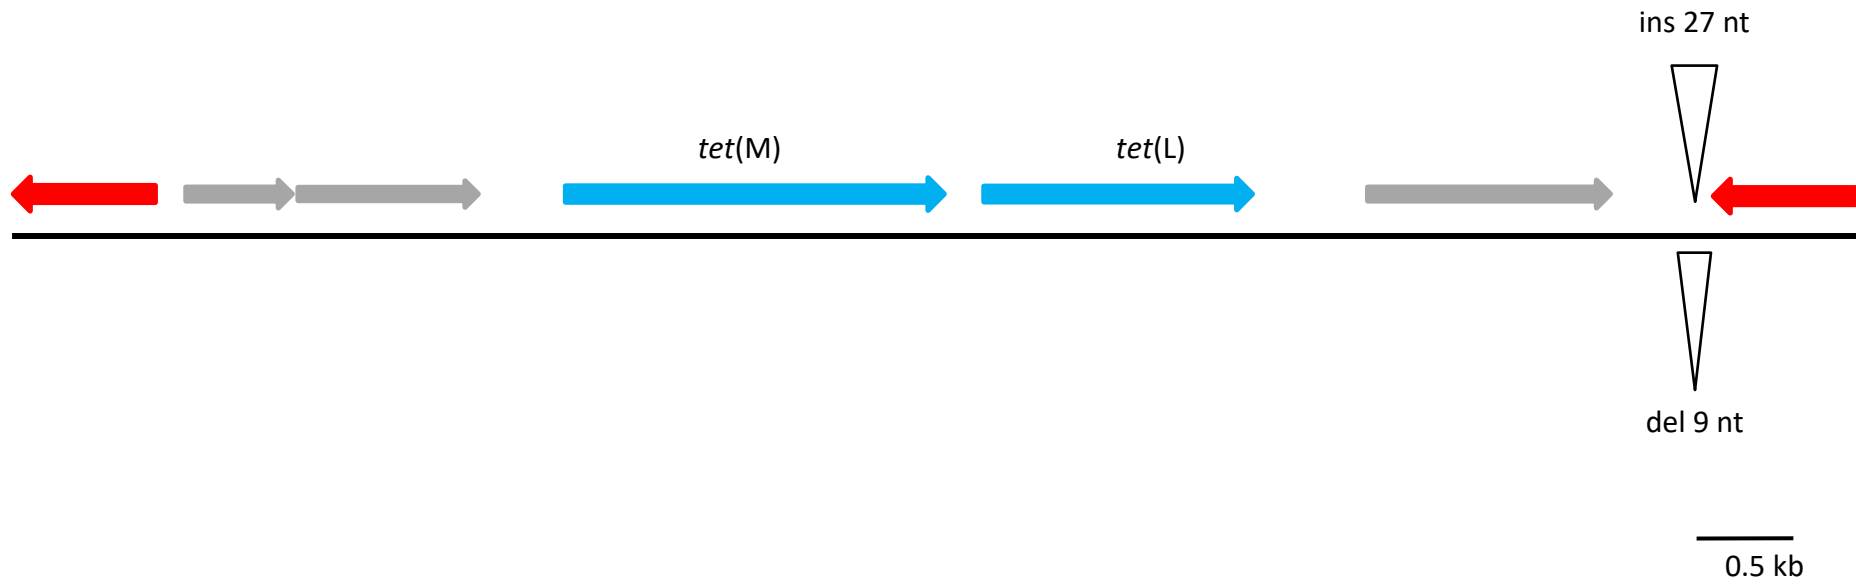

Supplement: 40121_2023_881_MOESM2_ESM.pdf [file 40121_2023_881_MOESM2_ESM.pdf]
